# Supplementary material for: Indium turns tellurium into an ovonic threshold switching selector via a stabilizing amorphous network
Source: Royal Society of Chemistry journal article supplement (doi:10.1039/d4tc01237b), 2024-01-01
Supplement: d4tc01237b1.pdf [file d4tc01237b1.pdf]

Supplementary Information

**Indium Turns Tellurium into Ovonic Threshold Switching Selector  
by Stabilizing Amorphous Network**

Huan Wang,<sup>a, #</sup> Rongchuan Gu,<sup>a, #</sup> Xianliang Mai,<sup>a</sup> Hengyi Hu,<sup>a</sup> Meng Xu,<sup>c</sup> Hao  
Tong,<sup>ab</sup> Zhongrui Wang,<sup>c</sup> Xiangshui Miao,<sup>ab</sup> and Ming Xu,<sup>ab, \*</sup>

Huan Wang,<sup>a, #</sup> Rongchuan Gu,<sup>a, #</sup> Xianliang Mai,<sup>a</sup> Hengyi Hu,<sup>a</sup> Meng Xu,<sup>c</sup> Hao  
Tong,<sup>ab</sup> Zhongrui Wang,<sup>c</sup> Xiangshui Miao,<sup>ab</sup> and Ming Xu,<sup>ab, \*</sup>

<sup>a</sup>*Wuhan National Laboratory for Optoelectronics, School of Integrated Circuits,  
Huazhong University of Science and Technology, Wuhan 430074, China*

<sup>b</sup>*Hubei Yangtze Memory Laboratories, Wuhan, 430205, China*

<sup>c</sup>*Department of Electrical and Electronic Engineering, the University of Hong Kong,  
Hong Kong, China*

<sup>#</sup>Huan Wang and Rongchuan Gu contributed equally to the work.

<sup>\*</sup>E-mail: [mxu@hust.edu.cn](mailto:mxu@hust.edu.cn) (M.X.)

## Figures

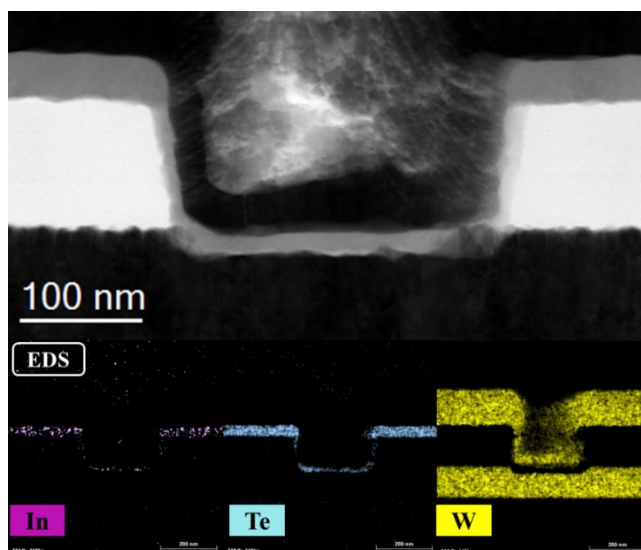

**Fig. S1.** Cross-sectional TEM image of the fabricated InTe<sub>9</sub> OTS device, with EDS mapping of In, Te, and W.

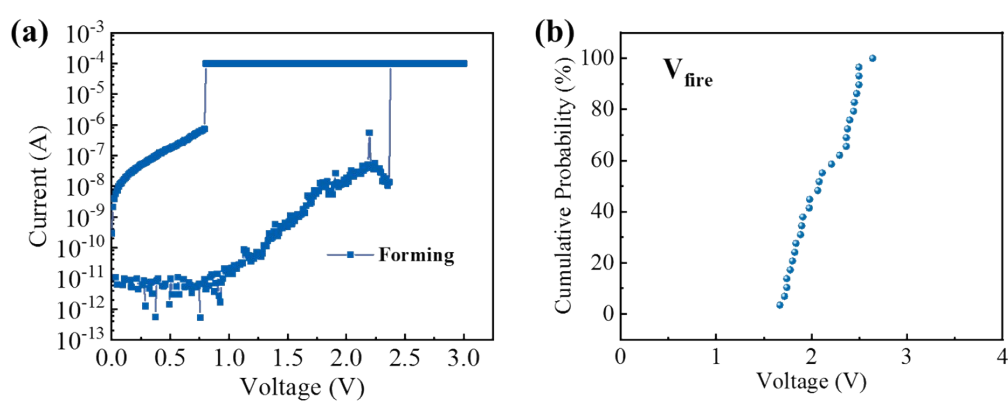

**Fig. S2.** (a) DC I-V sweep of the first-fire operation with a 100  $\mu$ A compliance current. (b) The distribution of the first-fire voltage ( $V_{ff}$ ), centered around 2.2 V.

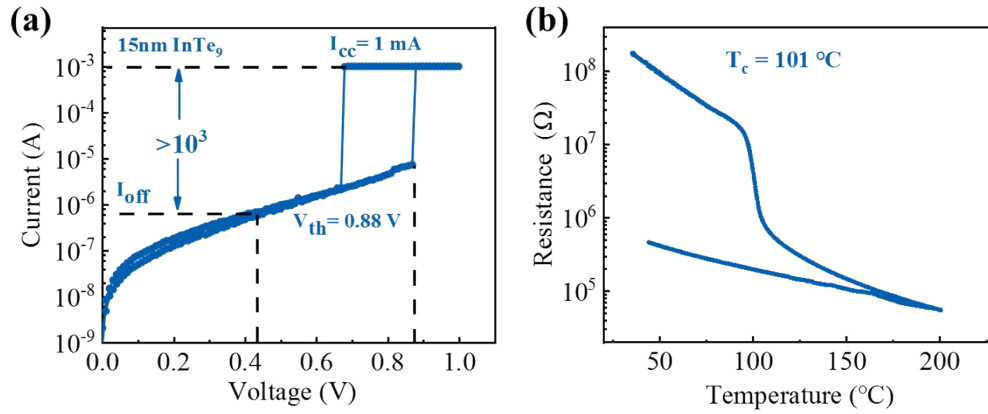

**Fig. S3.** (a) DC I-V sweep of the 15 nm-thick InTe<sub>9</sub> device, showing  $V_{th}$  and  $I_{off}$  of 0.88 V and 0.5  $\mu$ A, respectively. (b) The R-T relation of InTe<sub>9</sub> film, demonstrating that the crystallization temperature is  $\sim 100^{\circ}\text{C}$ .

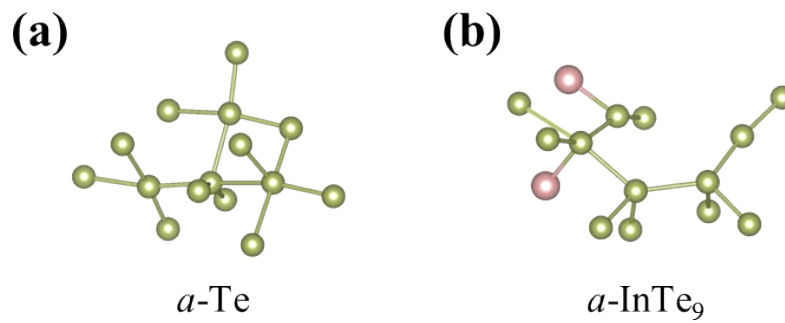

**Fig. S4.** MSGs projected to the real space. (a-b) The over-coordinated Te atoms in  $a\text{-Te}$  and  $a\text{-InTe}_9$ , respectively.

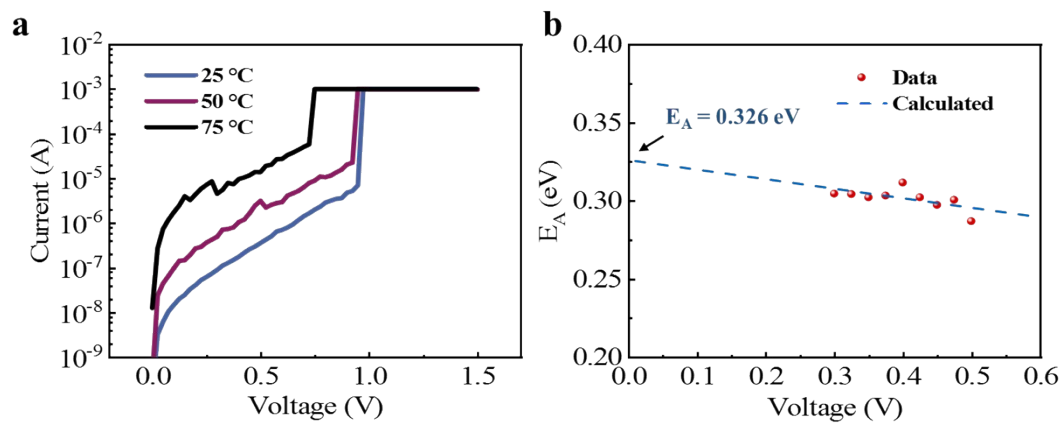

**Fig. S5.** (a) I-V-T measurement of OTS devices with a 1 mA compliance current. As the temperature increases,  $I_{\text{off}}$  and  $V_{\text{th}}$  decrease. (b) The voltage dependence of the activation energy for conduction ( $E_A$ ).
